# Supplementary material for: Standardized Extract of Valeriana officinalis Improves Overall Sleep Quality in Human Subjects with Sleep Complaints: A Randomized, Double-Blind, Placebo-Controlled, Clinical Study
Source: PubMed Central journal article supplement — Adv Ther. 2023 Oct 30;41(1):246–61. doi: 10.1007/s12325-023-02708-6 (PMC10796483; doi:10.1007/s12325-023-02708-6), 2023-10-30
Supplement: 12325_2023_2708_MOESM1_ESM.pdf [file 12325_2023_2708_MOESM1_ESM.pdf]

## Supplementary Material

### **Standardized extract of *Valeriana officinalis* improves overall sleep quality in human subjects with sleep complaints: a randomized, double-blind, placebo-controlled, clinical study**

Harshith Chandra Shekhar<sup>1</sup>, Lincy Joshua<sup>2</sup>, Jestin V Thomas<sup>2,\*</sup>

<sup>1</sup>BGS Global Institute of Medical Sciences, No.67, BGS Health and Education City, Uttarahalli Road, Kengeri, Bengaluru 560060, Karnataka, India

<sup>2</sup>Leads Clinical Research and Bio Services Pvt. Ltd. No.9, 1st Floor Mythri Legacy, Kalyan Nagar, Chelekere Main Road, Bengaluru 560043, Karnataka, India

Corresponding Author: Jestin V Thomas, Leads Clinical Research and Bio Services Pvt. Ltd. No.9, 1st Floor Mythri Legacy, Kalyan Nagar, Chelekere Main Road, Bengaluru 560043, Karnataka, India. Email: [jestin@leadsbio.com](mailto:jestin@leadsbio.com)

Supplementary Table 1 – Mean and mean change from baseline data for PSQI, Sleep latency, Actual sleep time, Sleep efficiency, Beck Anxiety Inventory, Feeling of waking up refreshed using VAS, and Epworth Sleepiness Scale

| Test Name                                | Visit    | Placebo (N=35) |                           |                          | VE (N=37)      |                           |                          | P-value by independent t-test              |
|------------------------------------------|----------|----------------|---------------------------|--------------------------|----------------|---------------------------|--------------------------|--------------------------------------------|
|                                          |          | Mean (SE)      | Change from Baseline (SE) | P-value by paired t-test | Mean (SE)      | Change from Baseline (SE) | P-value by paired t-test | Change from Baseline values Placebo vs. VE |
| Pittsburgh Sleep Quality Index (PSQI)    | Baseline | 11.43 (0.22)   | -                         | -                        | 11.89 (0.20)   | -                         | -                        | -                                          |
|                                          | Day 14   | 11.11 (0.20)   | -0.31 (0.22)              | 0.1691                   | 10.59 (0.20)   | -1.30 (0.24)              | 0.0000*                  | 0.0041*                                    |
|                                          | Day 28   | 11.43 (0.21)   | 0.00 (0.27)               | 1.0000                   | 10.27 (0.19)   | -1.62 (0.20)              | 0.0000*                  | 0.0000*                                    |
|                                          | Day 56   | 11.34 (0.19)   | -0.09 (0.28)              | 0.7607                   | 9.84 (0.18)    | -2.05 (0.23)              | 0.0000*                  | 0.0000*                                    |
| Sleep Latency by Wrist Actigraphy        | Baseline | 74.26 (5.24)   | -                         | -                        | 89.39 (8.20)   | -                         | -                        | -                                          |
|                                          | Day 3    | 122.34 (9.12)  | 48.08 (10.27)             | 0.0000*                  | 73.88 (7.76)   | -15.51 (6.79)             | 0.0283*                  | 0.0000*                                    |
|                                          | Day 14   | 81.51 (8.29)   | 7.25 (9.27)               | 0.4393                   | 52.72 (8.39)   | -36.67 (12.40)            | 0.0054*                  | 0.0060*                                    |
|                                          | Day 28   | 63.90 (9.39)   | -10.37 (10.33)            | 0.3229                   | 46.96 (6.80)   | -42.43 (10.48)            | 0.0003*                  | 0.0328*                                    |
|                                          | Day 56   | 62.53 (8.70)   | -11.73 (9.31)             | 0.2164                   | 41.36 (6.38)   | -48.03 (9.23)             | 0.0000*                  | 0.0072*                                    |
| Actual Sleep Time by Wrist Actigraphy    | Baseline | 339.80 (6.40)  | -                         | -                        | 306.09 (7.61)  | -                         | -                        | -                                          |
|                                          | Day 3    | 303.21 (7.71)  | -36.59 (9.14)             | 0.0003*                  | 325.89 (8.19)  | 19.80 (7.37)              | 0.0108*                  | 0.0000*                                    |
|                                          | Day 14   | 329.46 (8.09)  | -10.35 (9.31)             | 0.2744                   | 344.86 (10.08) | 38.76 (10.31)             | 0.0006*                  | 0.0007*                                    |
|                                          | Day 28   | 341.46 (8.37)  | 1.65 (9.61)               | 0.8645                   | 346.39 (11.10) | 40.30 (8.89)              | 0.0001*                  | 0.0043*                                    |
|                                          | Day 56   | 342.13 (9.16)  | 2.33 (9.84)               | 0.8144                   | 362.41 (8.22)  | 56.31 (9.89)              | 0.0000*                  | 0.0002*                                    |
| Sleep Efficiency by Wrist Actigraphy     | Baseline | 72.87 (1.15)   | -                         | -                        | 66.40 (1.67)   | -                         | -                        | -                                          |
|                                          | Day 3    | 63.05 (1.53)   | -9.82 (1.80)              | 0.0000*                  | 69.07 (1.74)   | 2.66 (1.52)               | 0.0885#                  | 0.0000*                                    |
|                                          | Day 14   | 71.40 (1.78)   | -1.46 (1.90)              | 0.4472                   | 74.21 (1.98)   | 7.81 (2.17)               | 0.0010*                  | 0.0020*                                    |
|                                          | Day 28   | 73.10 (1.81)   | 0.23 (1.95)               | 0.9065                   | 74.00 (2.23)   | 7.60 (1.82)               | 0.0002*                  | 0.0073*                                    |
|                                          | Day 56   | 73.47 (1.76)   | 0.61 (1.80)               | 0.7388                   | 77.73 (1.59)   | 11.33 (1.85)              | 0.0000*                  | 0.0001*                                    |
| Beck Anxiety Inventory                   | Baseline | 11.57 (0.24)   | -                         | -                        | 11.30 (0.22)   | -                         | -                        | -                                          |
|                                          | Day 3    | 11.51 (0.22)   | -0.06 (0.07)              | 0.4221                   | 11.11 (0.20)   | -0.19 (0.09)              | 0.0328*                  | 0.2362                                     |
|                                          | Day 14   | 11.46 (0.23)   | -0.11 (0.09)              | 0.2105                   | 10.70 (0.18)   | -0.59 (0.13)              | 0.0001*                  | 0.0036*                                    |
|                                          | Day 28   | 11.69 (0.24)   | 0.11 (0.13)               | 0.3788                   | 10.38 (0.19)   | -0.92 (0.17)              | 0.0000*                  | 0.0000*                                    |
|                                          | Day 56   | 11.60 (0.27)   | 0.03 (0.14)               | 0.8448                   | 10.22 (0.20)   | -1.08 (0.20)              | 0.0000*                  | 0.0000*                                    |
| Feeling of waking up refreshed using VAS | Baseline | 7.29 (0.13)    | -                         | -                        | 6.98 (0.15)    | -                         | -                        | -                                          |
|                                          | Day 3    | 7.26 (0.15)    | -0.03 (0.11)              | 0.7749                   | 6.78 (0.14)    | -0.20 (0.08)              | 0.0112*                  | 0.2172                                     |
|                                          | Day 14   | 7.16 (0.15)    | -0.14 (0.14)              | 0.3530                   | 6.50 (0.13)    | -0.48 (0.11)              | 0.0001*                  | 0.0646#                                    |
|                                          | Day 28   | 7.11 (0.15)    | -0.18 (0.13)              | 0.1733                   | 6.26 (0.11)    | -0.72 (0.13)              | 0.0000*                  | 0.0047*                                    |
|                                          | Day 56   | 7.02 (0.15)    | -0.27 (0.14)              | 0.0657#                  | 5.94 (0.07)    | -1.04 (0.16)              | 0.0000*                  | 0.0007*                                    |
| Epworth Sleepiness Scale                 | Baseline | 8.74 (0.32)    | -                         | -                        | 8.65 (0.25)    | -                         | -                        | -                                          |
|                                          | Day 3    | 8.80 (0.31)    | 0.06 (0.06)               | 0.3244                   | 8.57 (0.25)    | -0.08 (0.05)              | 0.0831#                  | 0.0628#                                    |

|        |             |              |        |             |              |         |         |
|--------|-------------|--------------|--------|-------------|--------------|---------|---------|
| Day 14 | 8.69 (0.33) | -0.06 (0.09) | 0.5349 | 8.30 (0.24) | -0.35 (0.12) | 0.0050* | 0.0522# |
| Day 28 | 8.77 (0.30) | 0.03 (0.12)  | 0.8124 | 8.08 (0.21) | -0.57 (0.14) | 0.0002* | 0.0016* |
| Day 56 | 8.71 (0.32) | -0.03 (0.13) | 0.8223 | 7.89 (0.19) | -0.76 (0.16) | 0.0000* | 0.0007* |

\*p<0.05 VE over placebo; # p<0.1 & p>0.05 VE over placebo

N - Number of subjects in the specified treatment; n - number of subjects in the specified category; SE – Standard Error
